# Supplementary material for: Analysis and Forecasting of the Energy Consumption in Wastewater Treatment Plant
Source: Hindawi journal article supplement (doi:10.1155/2019/8690898), 2019-01-01
Supplement: f1 [file 8690898.f1.pdf]

The data in this paper were collected from the daily records of a municipal wastewater treatment plant, and there added up to 360 samples (from 25th December 2015 to 24th December 2016) after removing six invalid samples. The statistical describes energy consumption and influencing factors are depicted in Table 1.

For each variable, the RBF model used the first 50 data as the in-sample period. The data from 51 to 60 was used to evaluate the forecasting performance.

Table 1 describes energy consumption, inflow load, COD removal, total nitrogen removal.

|      | Inflow loads             | COD removal | Total nitrogen removal | Energy consumption |
|------|--------------------------|-------------|------------------------|--------------------|
| Unit | $10^4 \times \text{m}^3$ | tons        | tons                   | kWh                |
| 1.   | 7                        | 17          | 2                      | 21177              |
| 2.   | 7.09                     | 13.39       | 2.00                   | 20085              |
| 3.   | 7.18                     | 16.37       | 1.99                   | 20729              |
| 4.   | 7.08                     | 16.63       | 2.11                   | 20688              |
| 5.   | 7.01                     | 11.14       | 2.06                   | 20906              |
| 6.   | 7.18                     | 13.64       | 2.01                   | 20657              |
| 7.   | 7.46                     | 12.09       | 2.09                   | 20974              |
| 8.   | 7.02                     | 11.17       | 2.08                   | 20391              |
| 9.   | 7.17                     | 17.86       | 2.30                   | 21039              |
| 10.  | 6.90                     | 8.97        | 2.19                   | 20096              |
| 11.  | 6.71                     | 14.57       | 2.22                   | 19348              |
| 12.  | 5.84                     | 12.56       | 2.12                   | 23093              |
| 13.  | 7.31                     | 18.85       | 1.90                   | 20769              |
| 14.  | 7.41                     | 11.26       | 1.86                   | 19655              |
| 15.  | 6.94                     | 12.42       | 1.85                   | 19376              |
| 16.  | 7.19                     | 15.18       | 2.28                   | 19852              |
| 17.  | 6.53                     | 17.23       | 2.33                   | 21025              |
| 18.  | 8.03                     | 17.99       | 2.38                   | 20758              |
| 19.  | 7.33                     | 8.29        | 1.58                   | 18855              |
| 20.  | 7.81                     | 9.37        | 2.18                   | 19569              |
| 21.  | 7.45                     | 13.11       | 2.10                   | 19561              |
| 22.  | 7.56                     | 9.98        | 2.00                   | 19989              |
| 23.  | 7.52                     | 8.57        | 1.86                   | 19512              |
| 24.  | 7.35                     | 12.42       | 2.01                   | 19640              |
| 25.  | 7.39                     | 8.35        | 1.57                   | 19965              |
| 26.  | 7.38                     | 10.78       | 1.92                   | 18974              |
| 27.  | 7.57                     | 9.76        | 2.09                   | 18909              |
| 28.  | 7.52                     | 11.51       | 1.96                   | 19818              |
| 29.  | 7.58                     | 10.62       | 1.32                   | 19654              |

|     |      |       |      |       |
|-----|------|-------|------|-------|
| 30. | 7.66 | 6.59  | 1.33 | 19894 |
| 31. | 7.29 | 8.38  | 1.60 | 18413 |
| 32. | 7.61 | 13.02 | 1.81 | 18069 |
| 33. | 6.43 | 11.18 | 1.62 | 18640 |
| 34. | 7.42 | 7.42  | 1.98 | 18738 |
| 35. | 7.94 | 10.96 | 2.03 | 20592 |
| 36. | 7.72 | 4.17  | 0.88 | 21244 |
| 37. | 7.44 | 4.09  | 0.90 | 20076 |
| 38. | 7.49 | 7.79  | 1.27 | 19464 |
| 39. | 7.95 | 7.47  | 1.51 | 21071 |
| 40. | 7.90 | 6.00  | 0.76 | 19992 |
| 41. | 7.66 | 9.88  | 1.21 | 19330 |
| 42. | 7.63 | 11.44 | 1.40 | 19282 |
| 43. | 7.67 | 12.43 | 1.67 | 18689 |
| 44. | 6.61 | 6.94  | 1.25 | 18297 |
| 45. | 6.46 | 6.98  | 1.22 | 18157 |
| 46. | 5.86 | 11.84 | 1.10 | 17409 |
| 47. | 5.39 | 4.85  | 0.74 | 16749 |
| 48. | 5.76 | 5.53  | 1.08 | 17027 |
| 49. | 7.49 | 24.49 | 1.46 | 18734 |
| 50. | 7.44 | 4.24  | 0.90 | 17786 |
| 51. | 7.34 | 10.56 | 1.19 | 17496 |
| 52. | 7.12 | 4.77  | 1.13 | 18090 |
| 53. | 6.43 | 6.43  | 1.04 | 19019 |
| 54. | 6.50 | 5.33  | 1.34 | 20448 |
| 55. | 6.83 | 7.86  | 1.60 | 21513 |
| 56. | 7.74 | 9.67  | 1.86 | 22578 |
| 57. | 7.50 | 10.72 | 1.56 | 22394 |
| 58. | 7.78 | 7.01  | 1.68 | 21481 |
| 59. | 7.41 | 8.96  | 1.69 | 21299 |
| 60. | 7.59 | 8.19  | 1.81 | 20646 |
| 61. | 7.60 | 11.93 | 1.74 | 19583 |
| 62. | 5.93 | 9.78  | 1.61 | 17274 |
| 63. | 7.49 | 13.49 | 2.21 | 20893 |
| 64. | 7.77 | 10.79 | 2.16 | 22380 |
| 65. | 7.58 | 18.33 | 1.75 | 23071 |
| 66. | 7.75 | 25.02 | 2.02 | 23263 |
| 67. | 7.55 | 16.23 | 2.04 | 23529 |
| 68. | 7.26 | 14.97 | 1.99 | 22531 |
| 69. | 7.17 | 10.76 | 2.26 | 24715 |
| 70. | 7.50 | 10.35 | 2.34 | 24498 |
| 71. | 7.50 | 12.30 | 2.71 | 24136 |

|      |       |        |       |       |
|------|-------|--------|-------|-------|
| 72.  | 7. 45 | 9. 68  | 2. 44 | 24953 |
| 73.  | 7. 25 | 10. 44 | 2. 28 | 23527 |
| 74.  | 7. 79 | 18. 07 | 2. 65 | 25819 |
| 75.  | 7. 08 | 14. 02 | 2. 05 | 24664 |
| 76.  | 7. 33 | 13. 13 | 2. 38 | 25616 |
| 77.  | 7. 99 | 13. 82 | 2. 00 | 24421 |
| 78.  | 8. 17 | 7. 93  | 1. 41 | 23461 |
| 79.  | 7. 66 | 5. 75  | 1. 89 | 22503 |
| 80.  | 7. 91 | 10. 05 | 1. 63 | 24269 |
| 81.  | 8. 19 | 7. 78  | 0. 93 | 23465 |
| 82.  | 7. 48 | 5. 38  | 1. 17 | 21508 |
| 83.  | 7. 77 | 6. 06  | 1. 51 | 20910 |
| 84.  | 7. 53 | 8. 58  | 1. 73 | 22490 |
| 85.  | 8. 26 | 8. 59  | 1. 84 | 23465 |
| 86.  | 7. 88 | 8. 75  | 1. 00 | 22699 |
| 87.  | 8. 02 | 6. 66  | 1. 12 | 22570 |
| 88.  | 7. 89 | 3. 79  | 0. 61 | 22602 |
| 89.  | 7. 97 | 3. 67  | 0. 59 | 22052 |
| 90.  | 8. 31 | 3. 24  | 0. 79 | 20974 |
| 91.  | 7. 91 | 3. 24  | 0. 59 | 19747 |
| 92.  | 7. 78 | 5. 14  | 0. 90 | 19609 |
| 93.  | 7. 83 | 12. 46 | 1. 28 | 20785 |
| 94.  | 7. 60 | 15. 19 | 1. 27 | 20772 |
| 95.  | 7. 59 | 7. 21  | 1. 53 | 20365 |
| 96.  | 7. 19 | 8. 05  | 1. 64 | 21007 |
| 97.  | 7. 52 | 9. 86  | 1. 78 | 23417 |
| 98.  | 7. 60 | 8. 97  | 1. 59 | 22985 |
| 99.  | 7. 41 | 7. 19  | 1. 87 | 23285 |
| 100. | 7. 42 | 8. 24  | 2. 00 | 23506 |
| 101. | 7. 45 | 25. 24 | 1. 79 | 23403 |
| 102. | 7. 58 | 13. 34 | 2. 03 | 23084 |
| 103. | 7. 30 | 13. 07 | 2. 08 | 23435 |
| 104. | 7. 26 | 28. 60 | 1. 98 | 24167 |
| 105. | 7. 57 | 23. 02 | 1. 93 | 22191 |
| 106. | 5. 74 | 15. 72 | 1. 65 | 22294 |
| 107. | 7. 57 | 36. 62 | 2. 10 | 24388 |
| 108. | 7. 37 | 34. 81 | 1. 93 | 22908 |
| 109. | 7. 28 | 14. 92 | 1. 68 | 23642 |
| 110. | 6. 95 | 19. 96 | 1. 33 | 23560 |
| 111. | 7. 65 | 35. 25 | 1. 45 | 20800 |
| 112. | 8. 27 | 12. 81 | 0. 88 | 21281 |
| 113. | 8. 22 | 8. 71  | 0. 93 | 22140 |

|      |       |        |       |       |
|------|-------|--------|-------|-------|
| 114. | 7. 89 | 11. 84 | 1. 05 | 22091 |
| 115. | 7. 05 | 8. 95  | 0. 84 | 22088 |
| 116. | 7. 54 | 10. 25 | 0. 52 | 22289 |
| 117. | 7. 05 | 22. 19 | 1. 26 | 20955 |
| 118. | 8. 01 | 12. 10 | 1. 02 | 21811 |
| 119. | 7. 66 | 13. 10 | 1. 36 | 21678 |
| 120. | 7. 26 | 7. 55  | 1. 39 | 22450 |
| 121. | 7. 63 | 35. 41 | 1. 69 | 22042 |
| 122. | 7. 62 | 29. 25 | 1. 92 | 20817 |
| 123. | 7. 73 | 20. 64 | 1. 22 | 21050 |
| 124. | 7. 45 | 21. 60 | 1. 01 | 20072 |
| 125. | 7. 54 | 30. 37 | 1. 01 | 21044 |
| 126. | 7. 54 | 13. 80 | 1. 10 | 20615 |
| 127. | 7. 63 | 10. 45 | 1. 61 | 21013 |
| 128. | 7. 65 | 7. 80  | 1. 58 | 21613 |
| 129. | 7. 67 | 19. 94 | 1. 47 | 22596 |
| 130. | 7. 52 | 8. 58  | 0. 86 | 21468 |
| 131. | 7. 42 | 10. 08 | 0. 92 | 19683 |
| 132. | 7. 67 | 9. 97  | 1. 07 | 21230 |
| 133. | 7. 73 | 15. 47 | 1. 20 | 23400 |
| 134. | 7. 51 | 11. 64 | 1. 97 | 22797 |
| 135. | 7. 60 | 12. 85 | 1. 71 | 22769 |
| 136. | 7. 29 | 12. 69 | 1. 48 | 22569 |
| 137. | 7. 70 | 16. 79 | 1. 80 | 23476 |
| 138. | 7. 89 | 22. 17 | 1. 89 | 22933 |
| 139. | 7. 65 | 14. 62 | 1. 99 | 21791 |
| 140. | 7. 61 | 19. 55 | 1. 30 | 22578 |
| 141. | 7. 46 | 12. 23 | 1. 41 | 22531 |
| 142. | 7. 82 | 17. 52 | 2. 09 | 23725 |
| 143. | 7. 80 | 18. 26 | 1. 70 | 22098 |
| 144. | 7. 57 | 16. 81 | 1. 95 | 22105 |
| 145. | 7. 65 | 16. 21 | 1. 84 | 22689 |
| 146. | 7. 87 | 11. 25 | 1. 83 | 22378 |
| 147. | 7. 70 | 17. 79 | 2. 34 | 21782 |
| 148. | 7. 46 | 9. 85  | 2. 00 | 20888 |
| 149. | 7. 74 | 10. 76 | 2. 06 | 23040 |
| 150. | 7. 71 | 12. 80 | 2. 03 | 22562 |
| 151. | 7. 61 | 9. 81  | 0. 79 | 20795 |
| 152. | 7. 27 | 11. 05 | 0. 70 | 20641 |
| 153. | 7. 03 | 9. 06  | 1. 04 | 20898 |
| 154. | 7. 21 | 12. 40 | 1. 32 | 21993 |
| 155. | 7. 38 | 6. 79  | 1. 14 | 21935 |

|      |       |        |       |           |
|------|-------|--------|-------|-----------|
| 156. | 7. 39 | 16. 48 | 1. 63 | 22219     |
| 157. | 7. 64 | 14. 45 | 1. 52 | 22541     |
| 158. | 7. 55 | 9. 96  | 1. 39 | 22782     |
| 159. | 7. 50 | 14. 48 | 0. 97 | 22617     |
| 160. | 7. 11 | 13. 51 | 1. 49 | 23329     |
| 161. | 7. 46 | 25. 35 | 1. 56 | 24174     |
| 162. | 7. 51 | 11. 64 | 1. 53 | 23625     |
| 163. | 7. 55 | 20. 38 | 1. 86 | 23864     |
| 164. | 7. 52 | 17. 14 | 1. 75 | 22497     |
| 165. | 7. 01 | 22. 63 | 1. 20 | 22194. 00 |
| 166. | 7. 34 | 21. 73 | 1. 29 | 22223. 00 |
| 167. | 7. 33 | 16. 92 | 2. 14 | 22048. 00 |
| 168. | 7. 14 | 12. 07 | 1. 26 | 21563. 00 |
| 169. | 7. 05 | 9. 51  | 1. 63 | 21605. 00 |
| 170. | 7. 15 | 10. 43 | 1. 64 | 21398. 00 |
| 171. | 7. 46 | 12. 39 | 1. 38 | 21599. 00 |
| 172. | 7. 32 | 12. 60 | 1. 58 | 22378. 00 |
| 173. | 7. 57 | 10. 82 | 1. 38 | 22609. 00 |
| 174. | 7. 34 | 7. 85  | 1. 41 | 21630. 00 |
| 175. | 7. 62 | 10. 58 | 1. 68 | 23359. 00 |
| 176. | 7. 29 | 5. 40  | 1. 56 | 22170. 00 |
| 177. | 7. 27 | 9. 75  | 1. 35 | 22414. 00 |
| 178. | 7. 21 | 11. 31 | 1. 23 | 21111. 00 |
| 179. | 7. 39 | 14. 71 | 1. 28 | 22610. 00 |
| 180. | 7. 31 | 20. 83 | 1. 43 | 24826. 00 |
| 181. | 7. 27 | 15. 92 | 1. 78 | 24209. 00 |
| 182. | 7. 23 | 14. 67 | 1. 76 | 24095. 00 |
| 183. | 7. 30 | 11. 03 | 1. 82 | 22927. 00 |
| 184. | 7. 11 | 52. 20 | 2. 40 | 23521. 00 |
| 185. | 7. 20 | 49. 77 | 2. 02 | 25072. 00 |
| 186. | 7. 37 | 43. 69 | 1. 85 | 21254. 00 |
| 187. | 7. 21 | 43. 86 | 1. 78 | 23025. 00 |
| 188. | 7. 23 | 25. 44 | 1. 63 | 24032. 00 |
| 189. | 7. 22 | 9. 10  | 1. 70 | 23829. 00 |
| 190. | 7. 11 | 10. 31 | 1. 53 | 22901. 00 |
| 191. | 7. 47 | 36. 38 | 1. 92 | 22480. 00 |
| 192. | 7. 40 | 13. 69 | 2. 09 | 23303. 00 |
| 193. | 7. 46 | 12. 01 | 2. 10 | 24416. 00 |
| 194. | 7. 51 | 15. 25 | 2. 10 | 22578. 00 |
| 195. | 7. 75 | 12. 56 | 2. 42 | 24139. 00 |
| 196. | 7. 52 | 16. 01 | 2. 23 | 23871. 00 |
| 197. | 8. 08 | 13. 97 | 2. 37 | 23848. 00 |

|      |       |        |       |           |
|------|-------|--------|-------|-----------|
| 198. | 8. 13 | 18. 85 | 1. 30 | 24564. 00 |
| 199. | 7. 87 | 9. 44  | 0. 81 | 22274. 00 |
| 200. | 7. 93 | 7. 46  | 1. 28 | 22444. 00 |
| 201. | 7. 74 | 12. 77 | 1. 35 | 22426. 00 |
| 202. | 8. 24 | 6. 92  | 1. 70 | 22137. 00 |
| 203. | 8. 00 | 15. 52 | 1. 53 | 22027. 00 |
| 204. | 7. 95 | 7. 95  | 1. 43 | 21748. 00 |
| 205. | 8. 38 | 13. 83 | 2. 40 | 23039. 00 |
| 206. | 8. 26 | 9. 49  | 1. 54 | 21812. 00 |
| 207. | 8. 69 | 9. 91  | 1. 90 | 23655. 00 |
| 208. | 9. 52 | 14. 08 | 2. 37 | 25511. 00 |
| 209. | 9. 15 | 13. 91 | 2. 07 | 24278. 00 |
| 210. | 9. 39 | 12. 12 | 2. 54 | 24692. 00 |
| 211. | 9. 49 | 12. 81 | 2. 57 | 25670. 00 |
| 212. | 9. 52 | 15. 80 | 2. 54 | 25585. 00 |
| 213. | 9. 25 | 24. 96 | 2. 42 | 26143. 00 |
| 214. | 9. 27 | 25. 95 | 2. 67 | 26698. 00 |
| 215. | 9. 23 | 20. 21 | 2. 82 | 26913. 00 |
| 216. | 9. 14 | 10. 97 | 2. 47 | 26831. 00 |
| 217. | 7. 16 | 35. 94 | 2. 31 | 26388. 00 |
| 218. | 8. 12 | 23. 13 | 2. 37 | 26078. 00 |
| 219. | 7. 11 | 9. 67  | 2. 06 | 24530. 00 |
| 220. | 7. 48 | 15. 42 | 2. 09 | 25422. 00 |
| 221. | 7. 61 | 9. 52  | 2. 31 | 24796. 00 |
| 222. | 7. 16 | 21. 33 | 2. 11 | 25190. 00 |
| 223. | 7. 03 | 15. 40 | 2. 49 | 26076. 00 |
| 224. | 7. 19 | 16. 46 | 2. 32 | 25409. 00 |
| 225. | 7. 79 | 17. 84 | 2. 53 | 26516. 00 |
| 226. | 7. 81 | 6. 17  | 1. 85 | 23566. 00 |
| 227. | 7. 84 | 9. 96  | 2. 18 | 24208. 00 |
| 228. | 8. 57 | 17. 13 | 1. 82 | 25255. 00 |
| 229. | 8. 07 | 22. 04 | 1. 91 | 24754. 00 |
| 230. | 7. 96 | 14. 17 | 1. 23 | 23300. 00 |
| 231. | 7. 75 | 8. 37  | 1. 39 | 23988. 00 |
| 232. | 8. 90 | 16. 38 | 1. 47 | 24808. 00 |
| 233. | 9. 15 | 11. 07 | 1. 78 | 24592. 00 |
| 234. | 9. 05 | 12. 95 | 1. 24 | 22636. 00 |
| 235. | 8. 20 | 9. 10  | 1. 23 | 23850. 00 |
| 236. | 7. 90 | 15. 10 | 1. 65 | 25233. 00 |
| 237. | 7. 50 | 17. 24 | 1. 56 | 25086. 00 |
| 238. | 7. 92 | 15. 52 | 1. 42 | 25411. 00 |
| 239. | 7. 92 | 11. 48 | 1. 26 | 23196. 00 |

|      |       |        |       |           |
|------|-------|--------|-------|-----------|
| 240. | 7. 74 | 9. 28  | 1. 49 | 25484. 00 |
| 241. | 7. 13 | 18. 38 | 1. 52 | 24331. 00 |
| 242. | 8. 75 | 27. 57 | 2. 88 | 22158. 00 |
| 243. | 8. 49 | 29. 31 | 2. 54 | 22688. 00 |
| 244. | 8. 36 | 29. 78 | 3. 42 | 23392. 00 |
| 245. | 7. 90 | 24. 58 | 2. 39 | 23448. 00 |
| 246. | 8. 11 | 18. 81 | 2. 75 | 23753. 00 |
| 247. | 9. 39 | 34. 16 | 2. 43 | 23271. 00 |
| 248. | 8. 54 | 31. 00 | 1. 97 | 24703. 00 |
| 249. | 8. 64 | 36. 29 | 2. 36 | 24926. 00 |
| 250. | 7. 64 | 16. 97 | 2. 18 | 23330. 00 |
| 251. | 7. 62 | 31. 01 | 2. 33 | 22867. 00 |
| 252. | 7. 41 | 19. 77 | 2. 42 | 24611. 00 |
| 253. | 8. 28 | 21. 19 | 2. 47 | 25181. 00 |
| 254. | 8. 61 | 43. 22 | 2. 57 | 24332. 00 |
| 255. | 7. 72 | 20. 23 | 2. 56 | 21812. 00 |
| 256. | 7. 70 | 20. 33 | 2. 26 | 22480. 00 |
| 257. | 7. 57 | 23. 10 | 2. 11 | 22354. 00 |
| 258. | 7. 84 | 22. 42 | 2. 32 | 23428. 00 |
| 259. | 7. 94 | 44. 79 | 1. 72 | 21525. 00 |
| 260. | 8. 30 | 20. 24 | 1. 97 | 24542. 00 |
| 261. | 8. 10 | 11. 75 | 1. 64 | 24184. 00 |
| 262. | 8. 16 | 17. 30 | 2. 49 | 24990. 00 |
| 263. | 8. 30 | 20. 59 | 2. 11 | 23666. 00 |
| 264. | 8. 01 | 14. 75 | 1. 75 | 23342. 00 |
| 265. | 8. 84 | 21. 04 | 2. 88 | 25601. 00 |
| 266. | 7. 89 | 15. 38 | 1. 50 | 18638. 00 |
| 267. | 8. 34 | 17. 27 | 1. 69 | 20952. 00 |
| 268. | 8. 08 | 31. 10 | 1. 95 | 20942. 00 |
| 269. | 7. 93 | 19. 36 | 1. 92 | 21716. 00 |
| 270. | 7. 82 | 22. 05 | 2. 20 | 22588. 00 |
| 271. | 7. 71 | 17. 96 | 2. 26 | 22725. 00 |
| 272. | 8. 32 | 8. 07  | 2. 31 | 22966. 00 |
| 273. | 9. 43 | 33. 10 | 2. 35 | 21155. 00 |
| 274. | 9. 21 | 14. 92 | 1. 14 | 20808. 00 |
| 275. | 9. 30 | 13. 30 | 1. 27 | 22173. 00 |
| 276. | 8. 96 | 8. 87  | 1. 33 | 22934. 00 |
| 277. | 8. 99 | 9. 17  | 1. 74 | 23113. 00 |
| 278. | 8. 03 | 16. 78 | 1. 90 | 21420. 00 |
| 279. | 7. 61 | 10. 80 | 1. 33 | 22008. 00 |
| 280. | 7. 70 | 10. 78 | 2. 00 | 21094. 00 |
| 281. | 7. 60 | 19. 30 | 2. 01 | 20643. 00 |

|      |       |        |       |           |
|------|-------|--------|-------|-----------|
| 282. | 7. 73 | 19. 48 | 2. 38 | 21406. 00 |
| 283. | 8. 24 | 24. 73 | 2. 24 | 21253. 00 |
| 284. | 8. 37 | 8. 37  | 1. 20 | 21009. 00 |
| 285. | 8. 83 | 8. 92  | 1. 33 | 21351. 00 |
| 286. | 8. 32 | 7. 82  | 1. 10 | 19278. 00 |
| 287. | 8. 13 | 6. 09  | 1. 15 | 19785. 00 |
| 288. | 8. 36 | 6. 85  | 1. 55 | 20920. 00 |
| 289. | 8. 46 | 9. 81  | 1. 87 | 21689. 00 |
| 290. | 8. 22 | 12. 75 | 1. 92 | 21639. 00 |
| 291. | 8. 39 | 18. 45 | 2. 20 | 22809. 00 |
| 292. | 8. 28 | 9. 78  | 2. 25 | 21702. 00 |
| 293. | 8. 11 | 14. 11 | 2. 43 | 20101. 00 |
| 294. | 7. 70 | 10. 24 | 2. 29 | 20367. 00 |
| 295. | 7. 81 | 11. 48 | 2. 94 | 20784. 00 |
| 296. | 8. 09 | 13. 99 | 2. 33 | 21880. 00 |
| 297. | 7. 84 | 8. 85  | 1. 64 | 21447. 00 |
| 298. | 8. 40 | 12. 01 | 2. 04 | 22669. 00 |
| 299. | 7. 89 | 12. 38 | 2. 23 | 23769. 00 |
| 300. | 7. 90 | 8. 37  | 1. 93 | 23970. 00 |
| 301. | 7. 70 | 11. 40 | 2. 07 | 23754. 00 |
| 302. | 7. 23 | 26. 90 | 2. 12 | 23863. 00 |
| 303. | 7. 55 | 15. 17 | 2. 15 | 24992. 00 |
| 304. | 7. 49 | 32. 79 | 2. 24 | 23553. 00 |
| 305. | 7. 22 | 21. 23 | 2. 17 | 21514. 00 |
| 306. | 6. 71 | 12. 61 | 2. 03 | 21142. 00 |
| 307. | 7. 74 | 13. 16 | 2. 28 | 22509. 00 |
| 308. | 8. 07 | 16. 38 | 2. 37 | 22355. 00 |
| 309. | 7. 61 | 13. 70 | 2. 43 | 21732. 00 |
| 310. | 6. 37 | 14. 83 | 2. 18 | 20711. 00 |
| 311. | 6. 67 | 9. 80  | 2. 34 | 22787. 00 |
| 312. | 6. 33 | 12. 67 | 2. 36 | 21786. 00 |
| 313. | 7. 75 | 17. 13 | 2. 87 | 24040. 00 |
| 314. | 7. 45 | 24. 74 | 2. 56 | 24541. 00 |
| 315. | 7. 60 | 29. 35 | 2. 36 | 23925. 00 |
| 316. | 7. 87 | 32. 65 | 2. 56 | 23708. 00 |
| 317. | 7. 66 | 26. 89 | 2. 46 | 23802. 00 |
| 318. | 7. 32 | 24. 60 | 2. 55 | 22973. 00 |
| 319. | 7. 65 | 18. 13 | 2. 54 | 23038. 00 |
| 320. | 7. 96 | 13. 05 | 2. 52 | 22545. 00 |
| 321. | 8. 80 | 25. 34 | 2. 96 | 22949. 00 |
| 322. | 8. 21 | 18. 73 | 2. 02 | 20777. 00 |
| 323. | 7. 86 | 24. 28 | 3. 01 | 21221. 00 |



|      |      |       |      |          |
|------|------|-------|------|----------|
| 324. | 7.95 | 13.04 | 2.78 | 21041.00 |
| 325. | 7.65 | 17.37 | 2.60 | 22012.00 |
| 326. | 7.38 | 20.82 | 2.79 | 23354.00 |
| 327. | 7.80 | 27.68 | 2.59 | 22292.00 |
| 328. | 8.05 | 12.56 | 1.87 | 23014.00 |
| 329. | 8.21 | 20.20 | 1.88 | 23097.00 |
| 330. | 7.69 | 20.15 | 2.14 | 22448.00 |
| 331. | 7.70 | 6.86  | 1.81 | 22250.00 |
| 332. | 7.94 | 13.65 | 2.21 | 23570.00 |
| 333. | 8.56 | 17.46 | 1.52 | 20776.00 |
| 334. | 7.79 | 4.83  | 1.25 | 21890.00 |
| 335. | 7.02 | 6.18  | 1.56 | 20368.00 |
| 336. | 6.40 | 5.06  | 1.76 | 18800.00 |
| 337. | 7.79 | 8.18  | 2.09 | 21571.00 |
| 338. | 7.23 | 11.93 | 2.44 | 21496.00 |
| 339. | 5.93 | 12.03 | 1.75 | 21482.00 |
| 340. | 7.84 | 17.17 | 1.77 | 22800.00 |
| 341. | 7.68 | 8.91  | 2.24 | 22156.00 |
| 342. | 7.43 | 17.32 | 2.18 | 21320.00 |
| 343. | 7.23 | 12.94 | 2.35 | 22169.00 |
| 344. | 7.16 | 12.95 | 2.54 | 21968.00 |
| 345. | 7.33 | 16.86 | 2.62 | 21055.00 |
| 346. | 7.03 | 15.12 | 1.99 | 23181.00 |
| 347. | 7.63 | 21.28 | 2.48 | 23607.00 |
| 348. | 7.76 | 14.36 | 2.67 | 23188.00 |
| 349. | 7.62 | 16.69 | 2.53 | 22404.00 |
| 350. | 7.74 | 15.71 | 2.86 | 21458.00 |
| 351. | 8.34 | 18.85 | 2.54 | 23082.00 |
| 352. | 8.41 | 13.79 | 3.03 | 21797.00 |
| 353. | 8.24 | 14.83 | 2.89 | 20984.00 |
| 354. | 8.14 | 13.43 | 3.33 | 22040.00 |
| 355. | 8.43 | 20.58 | 3.17 | 23975.00 |
| 356. | 8.28 | 20.29 | 2.87 | 23762.00 |
| 357. | 8.50 | 10.80 | 3.03 | 24933.00 |
| 358. | 8.66 | 35.58 | 2.56 | 24110.00 |
| 359. | 8.53 | 8.35  | 1.38 | 23983.00 |
| 360. | 8.05 | 17.87 | 2.08 | 23841.00 |
